# Supplementary material for: Characterization and drug release behavior of chip-like amphiphilic chitosan–silica hybrid hydrogel for electrically modulated release of ethosuximide: an in vitro study
Source: Royal Society of Chemistry journal article supplement (doi:10.1039/c1jm12376a), 2011-01-01
Supplement: c1jm12376a.pdf [file c1jm12376a.pdf]

# Supporting Information

## **Characterization and Drug Release Behavior of Chip-like Amphiphilic Chitosan-Silica Hybrid Hydrogel for Electrically-modulated Release of Ethosuximide: an in-vitro study**

Wei-Chen Huang, Tai-Jung Lee, Chi-Sheng Hsiao, San-Yuan Chen\*

and Dean-Mo Liu\*

Department of Materials Sciences and Engineering, National Chiao Tung University, Hsinchu, Taiwan

The CHC hybrid hydrogels were synthesised by combining Genipin-crosslinked CHC together with acid-hydrolyzed TEOS in different ratio of composition. The synthetic procedure was described as follows.

In the first step, the synthesis of genipin-crosslinked CHC network is originated from nucleophilic attack by amino group of CHC toward the olefinic carbon atom at C-3 of deoxyloganin aglycone followed by the opening of the dihydropyran ring to form heterocyclic amine (Figure S1(a)). The conformation of the network segments of genipin-crosslinked CHC gels depends on the added amount of genipin. In the second step (Figure S1(b)), after genipin-crosslinked CHC network was formed, acid-hydrolyzed TEOS was added to complete sol-gel reaction.

Step 1 : Genipin-crosslinked CHC network

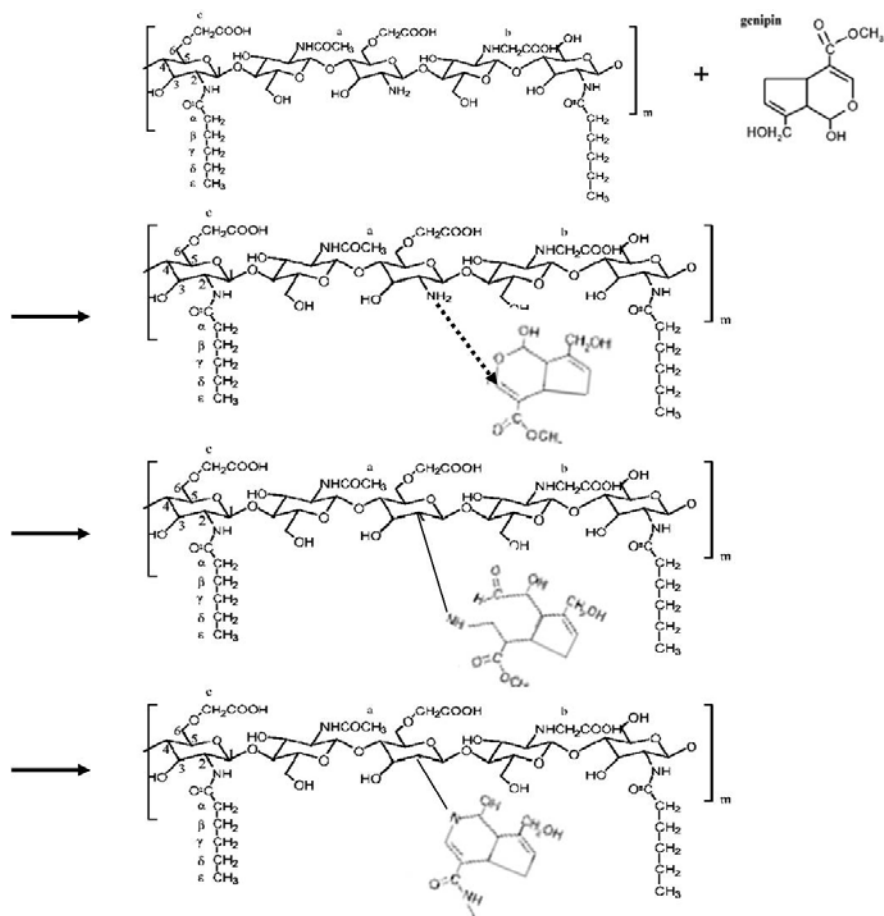

(b)

Step 2. acid-hydrolyzed TEOS

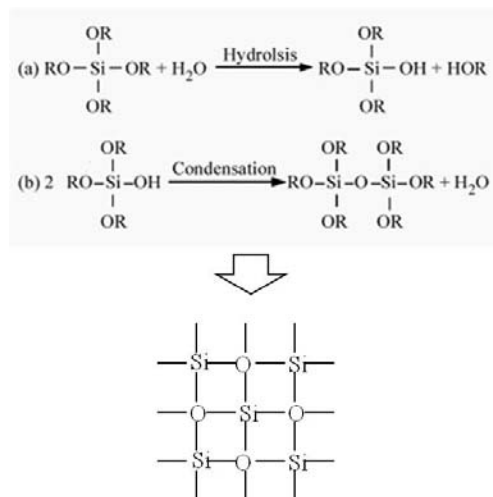

**Figure S1** Structural illustration of (a) Genipin-crosslinked CHC network (b) acid-hydrolyzed tetraethoxysilane (TEOS) by mixing TEOS with ethanol and HCl acidified H<sub>2</sub>O.

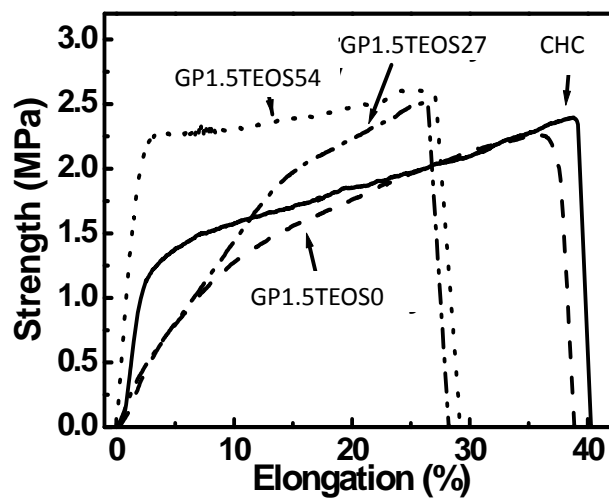

**Figure S2** Mechanical enhancement to the hybrid hydrogels can then be expected with higher TEOS content.

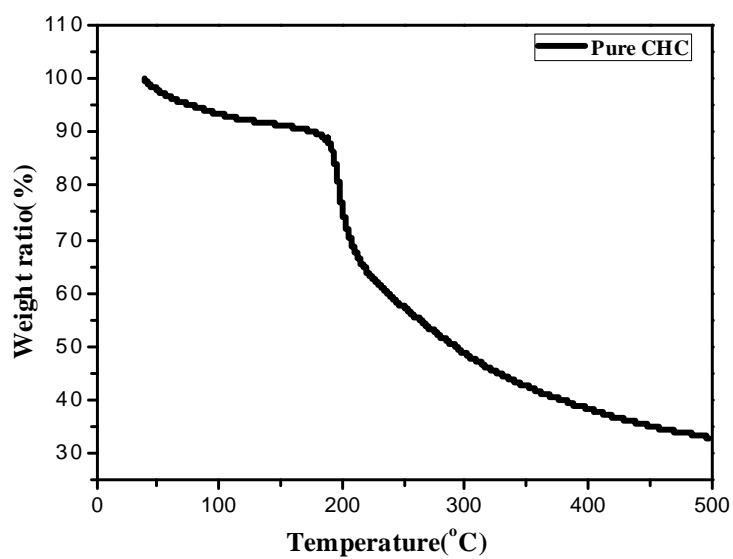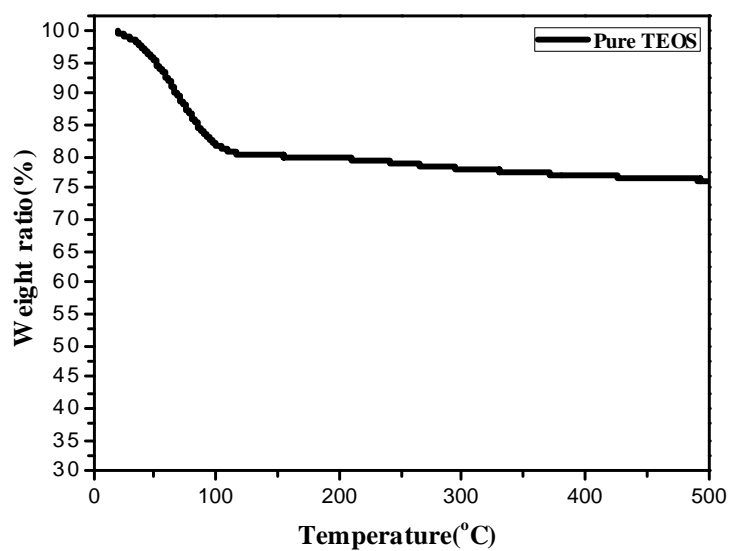

**Figure S3** TG curves for pure CHC and pure TEOS.
